# Supplementary material for: Tuning Electrochemical Hydrogen-Evolution Activity of CoMoO4 through Zn Incorporation
Source: MDPI journal article supplement (doi:10.3390/catal13050798), 2023-04-24
Supplement: s1 [file s1]

# Tuning Electrochemical Hydrogen-Evolution Activity of $\text{CoMoO}_4$ through Zn Incorporation

Sanaz Chamani <sup>1,†</sup>, Ebrahim Sadeghi <sup>1,2,†</sup>, Ugur Unal <sup>3,4</sup>, Naeimeh Sadat Peighambaroust <sup>1</sup> and Umut Aydemir <sup>1,4,\*</sup>

<sup>1</sup> Koç University Boron and Advanced Materials Applications and Research Center (KUBAM), Sariyer, Istanbul 34450, Turkey; schamani@ku.edu.tr (S.C.); esadeghi19@ku.edu.tr (E.S.); npeighambaroust@ku.edu.tr (N.S.P.)

<sup>2</sup> Graduate School of Sciences and Engineering, Koç University, Sariyer, Istanbul 34450, Turkey

<sup>3</sup> Koç University Surface Science and Technology Center (KUYTAM), Sariyer, Istanbul 34450, Turkey; ugunal@ku.edu.tr

<sup>4</sup> Department of Chemistry, Koç University, Sariyer, Istanbul 34450, Turkey

\* Correspondence: uaydemir@ku.edu.tr

† These authors contributed equally to this work.

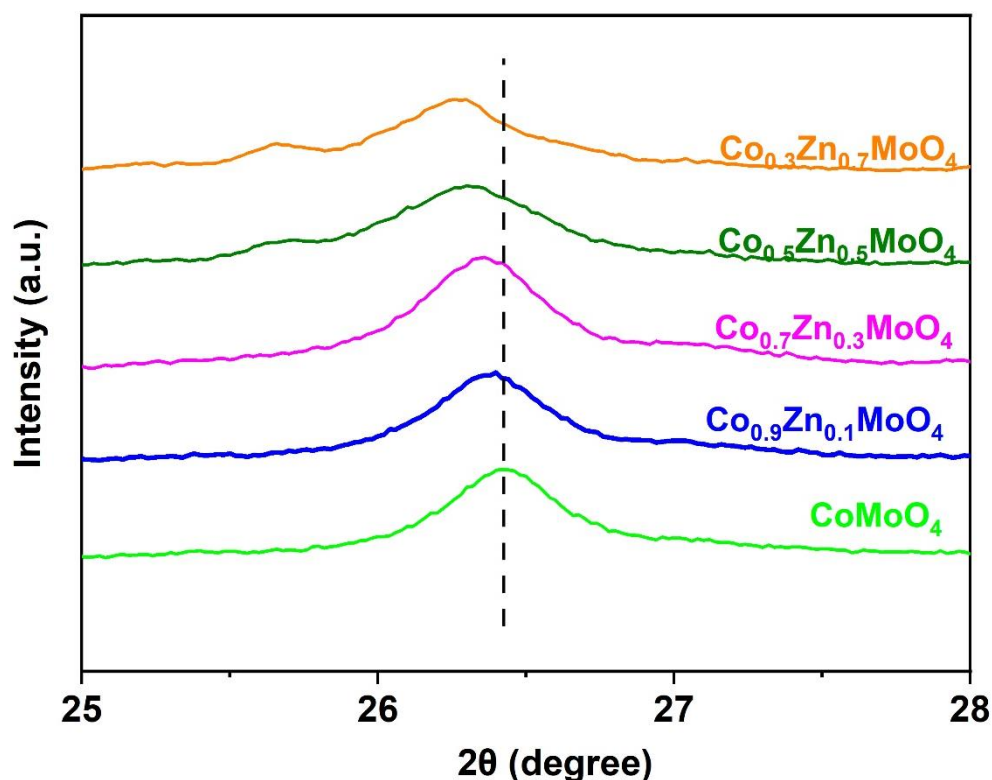

Figure S1. The shift of XRD (220) peaks for the prepared  $\text{Co}_{1-x}\text{Zn}_x\text{MoO}_4$  samples.

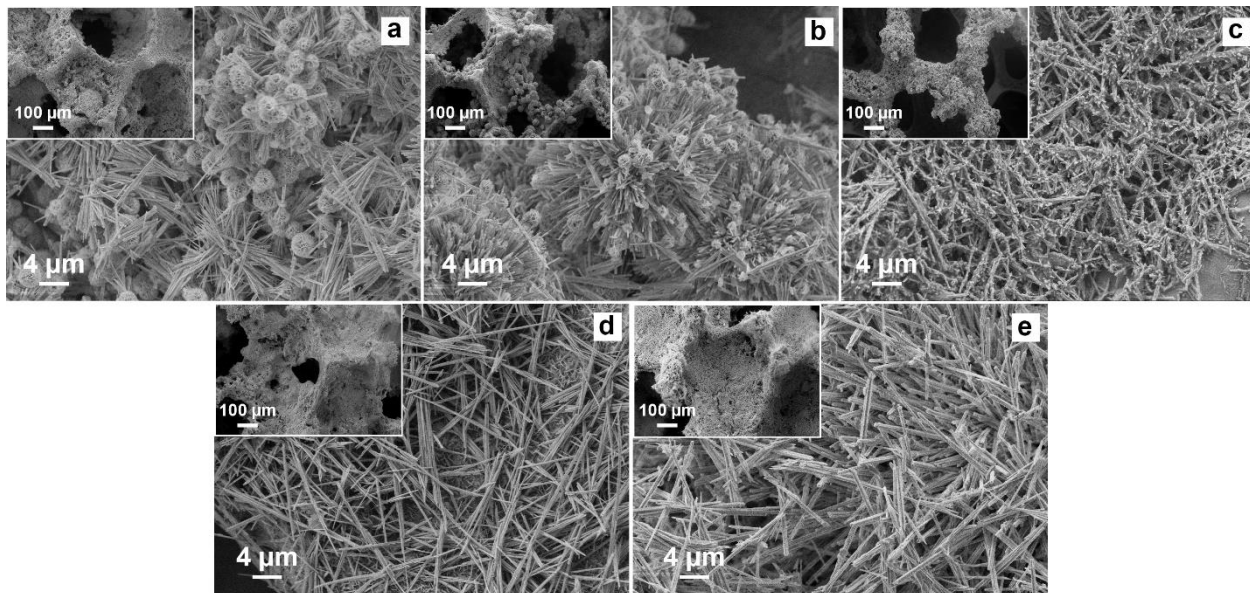

**Figure S2.** Depiction of the homogenous proliferation of catalysts on the backbone of NF substrate, (a)  $\text{CoMoO}_4$ , (b)  $\text{Co}_{0.9}\text{Zn}_{0.1}\text{MoO}_4$ , (c)  $\text{Co}_{0.7}\text{Zn}_{0.3}\text{MoO}_4$ , (d)  $\text{Co}_{0.5}\text{Zn}_{0.5}\text{MoO}_4$ , and (e)  $\text{Co}_{0.3}\text{Zn}_{0.7}\text{MoO}_4$ .

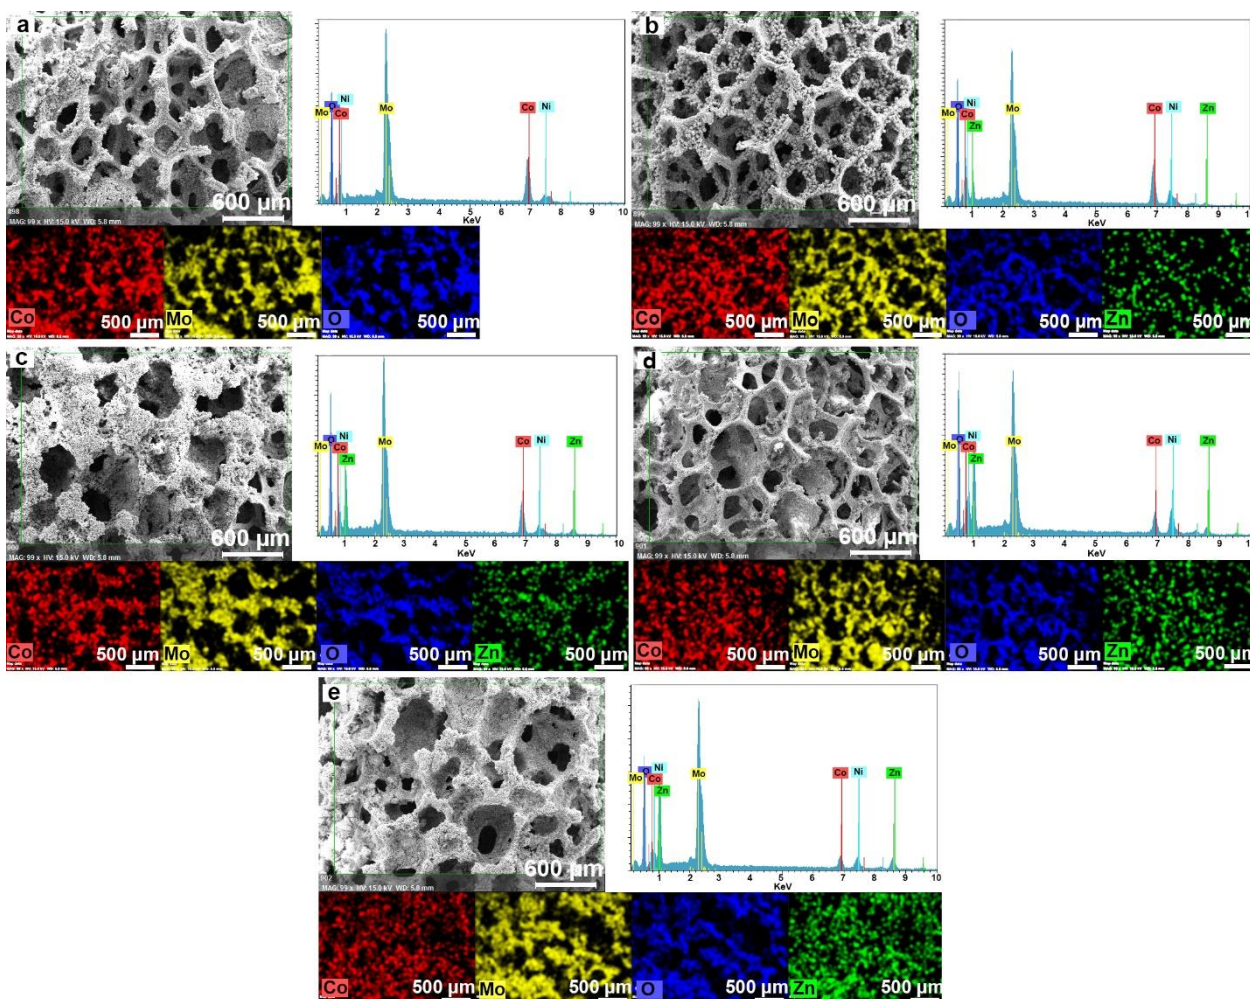

**Figure S3.** SEM/EDS and elemental mappings of (a)  $\text{CoMoO}_4$ , (b)  $\text{Co}_{0.9}\text{Zn}_{0.1}\text{MoO}_4$ , (c)  $\text{Co}_{0.7}\text{Zn}_{0.3}\text{MoO}_4$ , (d)  $\text{Co}_{0.5}\text{Zn}_{0.5}\text{MoO}_4$ , and (e)  $\text{Co}_{0.3}\text{Zn}_{0.7}\text{MoO}_4$  on NF, respectively.

**Table S1.** EDS elemental composition of  $\text{Co}_{1-x}\text{Zn}_x\text{MoO}_4$  ( $x = 0, 0.1, 0.3, 0.5$ , and  $0.7$ ).

| Sample                                                 | At. % |       | At. %<br>Mo | O     |
|--------------------------------------------------------|-------|-------|-------------|-------|
|                                                        | Co    | Zn    |             |       |
| <b>CoMoO<sub>4</sub></b>                               | 20.54 | -     | 20.93       | 58.53 |
| <b>Co<sub>0.9</sub>Zn<sub>0.1</sub>MoO<sub>4</sub></b> | 21.23 | 2.59  | 24.25       | 51.93 |
| <b>Co<sub>0.7</sub>Zn<sub>0.3</sub>MoO<sub>4</sub></b> | 11.30 | 3.81  | 12.34       | 72.55 |
| <b>Co<sub>0.5</sub>Zn<sub>0.5</sub>MoO<sub>4</sub></b> | 10.38 | 10.81 | 17.86       | 60.95 |
| <b>Co<sub>0.3</sub>Zn<sub>0.7</sub>MoO<sub>4</sub></b> | 5.98  | 12.91 | 20.48       | 60.63 |

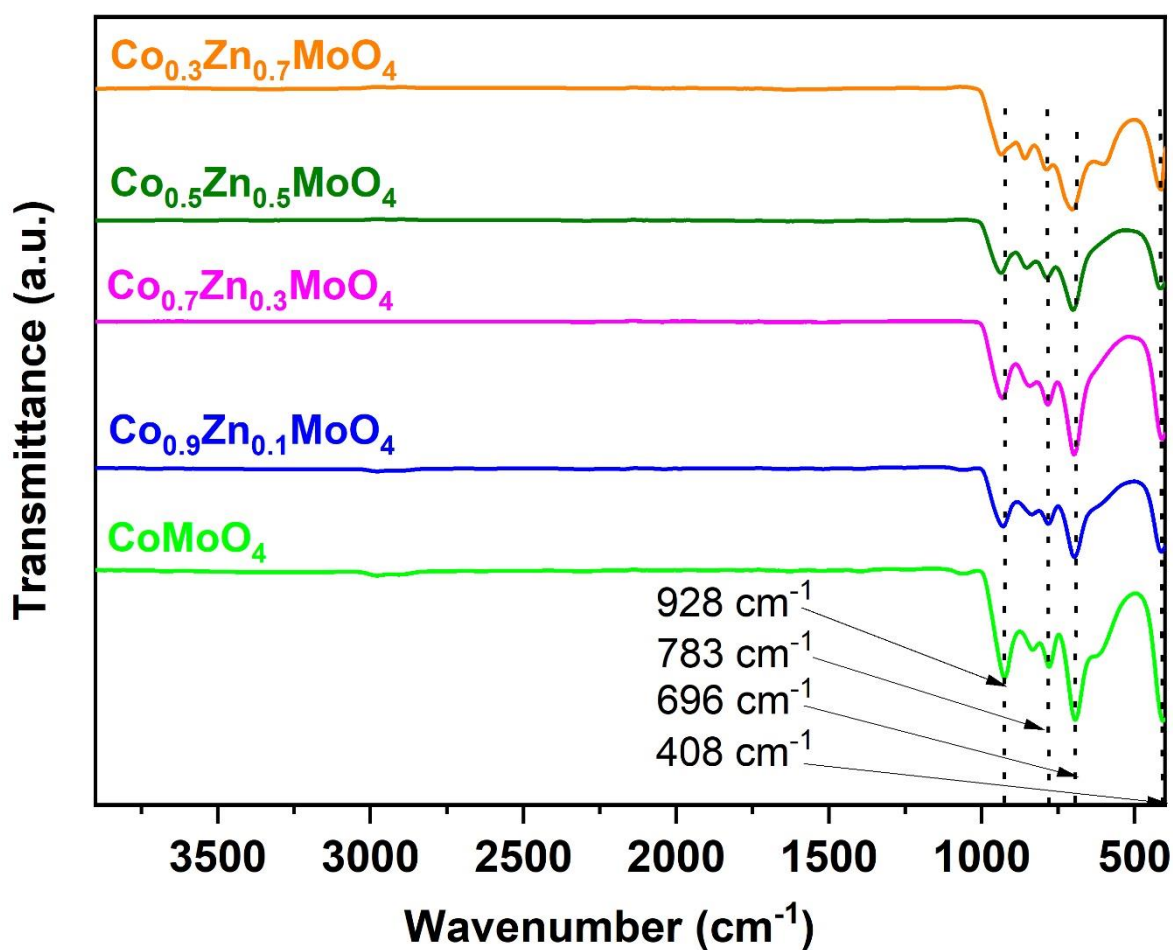

**Figure S4.** FT-IR Spectra of prepared  $\text{Co}_{1-x}\text{Zn}_x\text{MoO}_4$ .

**Table S2.** The XPS binding energy values for  $\text{CoMoO}_4$ ,  $\text{Co}_{0.5}\text{Zn}_{0.5}\text{MoO}_4$ , and  $\text{Co}_{0.5}\text{Zn}_{0.5}\text{MoO}_4$  after HER stability.

| Sample                                                                          | Co 2p            |                  | Mo 3d            |                  | O 1s<br>O <sub>latt</sub> | O 1s           |                  | Zn 2p<br>Zn <sup>2+</sup> |
|---------------------------------------------------------------------------------|------------------|------------------|------------------|------------------|---------------------------|----------------|------------------|---------------------------|
|                                                                                 | Co <sup>2+</sup> | Co <sup>3+</sup> | Mo <sup>4+</sup> | Mo <sup>6+</sup> |                           | O <sub>v</sub> | O <sub>ads</sub> |                           |
| <b>CoMoO<sub>4</sub></b>                                                        | 780.68           | 784.59           | 231.81           | 233.77           | 530.14                    | 533.54         | 537.06           | -                         |
| <b>Co<sub>0.5</sub>Zn<sub>0.5</sub>MoO<sub>4</sub></b>                          | 782.76           | 787.09           | 232.84           | 234.05           | 530.97                    | 532.17         | 534.12           | 1022.84                   |
| <b>Co<sub>0.5</sub>Zn<sub>0.5</sub>MoO<sub>4</sub> after<br/>HER satability</b> | 780.00           | 781.83           | 231.64           | 232.19           | 529.60                    | 530.74         | 531.85           | 1021.10                   |



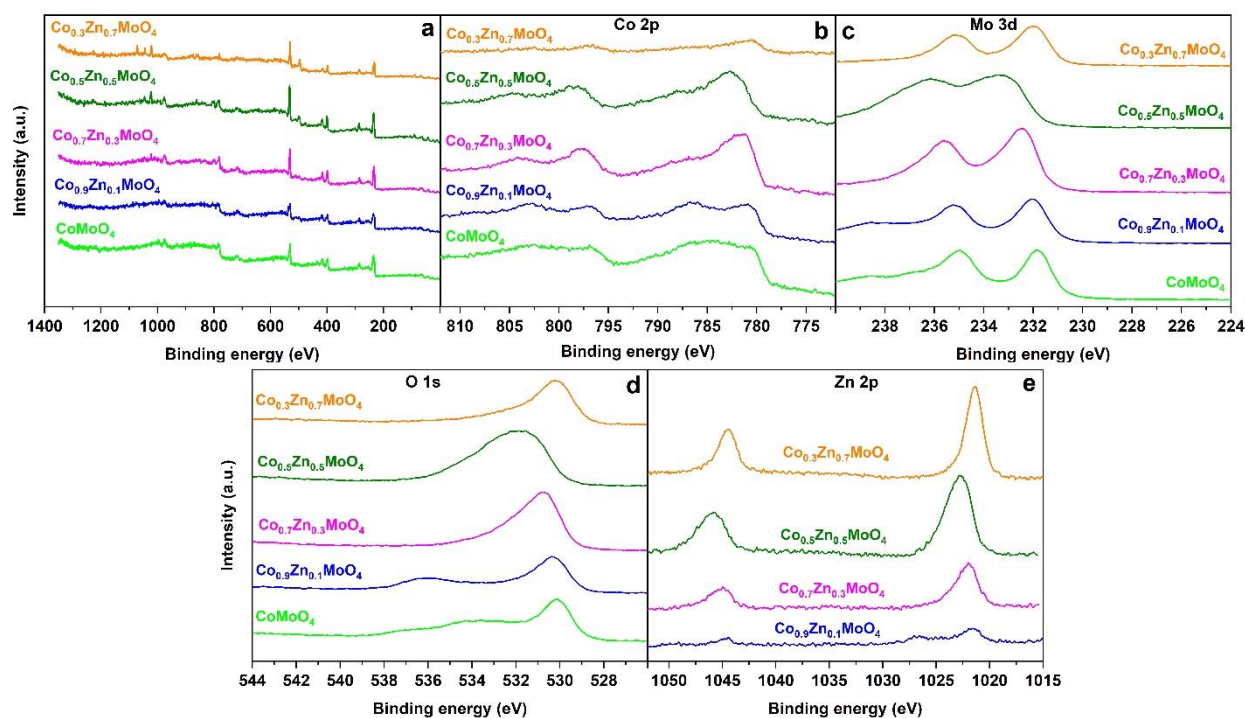

**Figure S5.** (a) XPS survey, (b) Co 2p, (c) Mo 3d, (d) O 1s, and (e) Zn 2p for  $\text{Co}_{1-x}\text{Zn}_x\text{MoO}_4$  ( $x = 0, 0.1, 0.3, 0.5, \text{ and } 0.7$ ).

**Table S3.** Comparing the HER performance of present work with previous studies.

| Electrocatalyst                                      | Electrolyte                    | $\eta_{\text{HER}}$ (mV) | Ref.                             |
|------------------------------------------------------|--------------------------------|--------------------------|----------------------------------|
| ZnO@ZnMoO <sub>4</sub>                               | KOH                            | $\eta^{10} = 360$        | Reference [49] in the manuscript |
| ZnWO <sub>4</sub>                                    | H <sub>2</sub> SO <sub>4</sub> | $\eta^{10} = 372$        | Reference [50] in the manuscript |
| Ppy/ZnWO <sub>4</sub>                                | H <sub>2</sub> SO <sub>4</sub> | $\eta^{10} = 543$        | Reference [50] in the manuscript |
| Cu <sub>0.4</sub> Ni <sub>0.6</sub> WO <sub>4</sub>  | H <sub>2</sub> SO <sub>4</sub> | $\eta^{10} = 463$        | Reference [51] in the manuscript |
| CuWO <sub>4</sub>                                    | H <sub>2</sub> SO <sub>4</sub> | $\eta^{10} = 574$        | Reference [51] in the manuscript |
| $\beta$ -NiMoO <sub>4</sub>                          | KOH                            | $\eta^{10} = 238$        | Reference [52] in the manuscript |
| NiMoO <sub>4</sub>                                   | KOH                            | $\eta^{10} = 339$        | Reference [53] in the manuscript |
| NiWO <sub>4</sub> /Ni <sub>3</sub> S <sub>2</sub>    | KOH                            | $\eta^{10} = 136$        | Reference [54] in the manuscript |
| CoMoO <sub>4</sub>                                   | KOH                            | $\eta^{10} = 353$        | Reference [18] in the manuscript |
| CoMoO <sub>4</sub> /Co <sub>9</sub> S <sub>8</sub>   | KOH                            | $\eta^{10} = 173$        | Reference [55] in the manuscript |
| CoMoO <sub>4</sub>                                   | KOH                            | $\eta^{10} = 275$        | Reference [20] in the manuscript |
| NiCo <sub>2</sub> O <sub>4</sub>                     | KOH                            | $\eta^{10} = 251$        | Reference [20] in the manuscript |
| CoMoO <sub>4</sub>                                   | KOH                            | $\eta^{10} = 288$        | This work                        |
| Co <sub>0.5</sub> Zn <sub>0.5</sub> MoO <sub>4</sub> | KOH                            | $\eta^{10} = 204$        | This work                        |

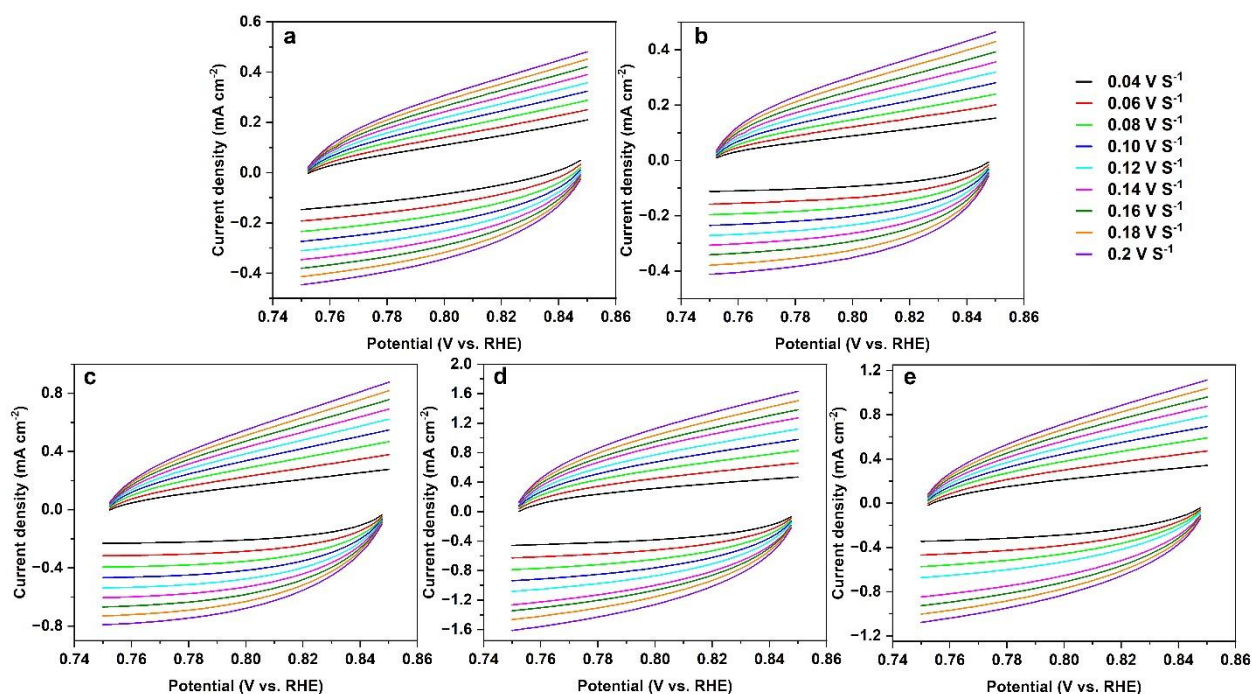

**Figure S6.** Typical cyclic voltammetry (CV) curves obtained at different scan rates ( $0.04\text{--}0.2\text{ V s}^{-1}$ ) within the potential window  $0.75\text{--}0.85\text{ V vs RHE}$  for (a)  $\text{CoMoO}_4$ , (b)  $\text{Co}_{0.9}\text{Zn}_{0.1}\text{MoO}_4$ , (c)  $\text{Co}_{0.7}\text{Zn}_{0.3}\text{MoO}_4$ , (d)  $\text{Co}_{0.5}\text{Zn}_{0.5}\text{MoO}_4$ , and (e)  $\text{Co}_{0.3}\text{Zn}_{0.7}\text{MoO}_4$ .

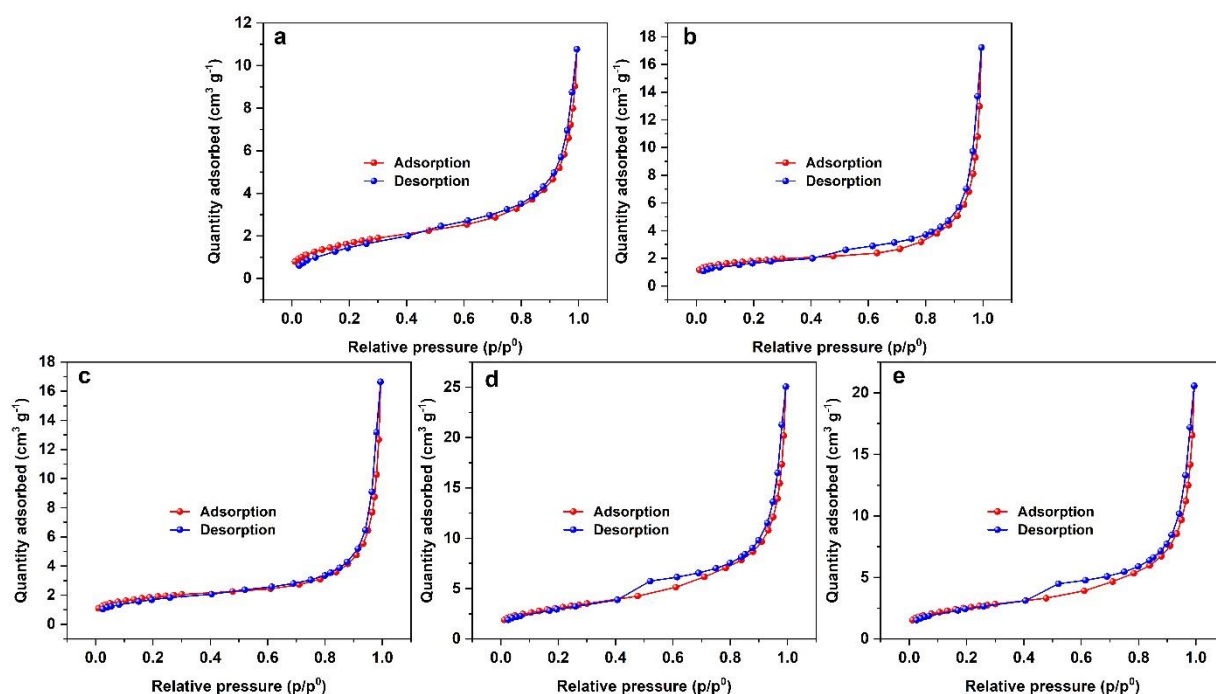

**Figure S7.**  $\text{N}_2$  adsorption-desorption isotherms of (a)  $\text{CoMoO}_4$ , (b)  $\text{Co}_{0.9}\text{Zn}_{0.1}\text{MoO}_4$ , (c)  $\text{Co}_{0.7}\text{Zn}_{0.3}\text{MoO}_4$ , (d)  $\text{Co}_{0.5}\text{Zn}_{0.5}\text{MoO}_4$ , and (e)  $\text{Co}_{0.3}\text{Zn}_{0.7}\text{MoO}_4$ .

**Table S4.** Further details derived from BET analysis of the samples.

| Sample                                                 | BET surface area (m <sup>2</sup> /g) | External surface area (m <sup>2</sup> /g) | Average pore diameter (nm) |
|--------------------------------------------------------|--------------------------------------|-------------------------------------------|----------------------------|
| <b>CoMoO<sub>4</sub></b>                               | 6.10                                 | 6.87                                      | 10.9                       |
| <b>Co<sub>0.9</sub>Zn<sub>0.1</sub>MoO<sub>4</sub></b> | 6.05                                 | 4.06                                      | 19.9                       |
| <b>Co<sub>0.7</sub>Zn<sub>0.3</sub>MoO<sub>4</sub></b> | 6.39                                 | 5.27                                      | 21.4                       |
| <b>Co<sub>0.5</sub>Zn<sub>0.5</sub>MoO<sub>4</sub></b> | 10.95                                | 10.65                                     | 13.1                       |
| <b>Co<sub>0.3</sub>Zn<sub>0.7</sub>MoO<sub>4</sub></b> | 8.84                                 | 7.97                                      | 14.1                       |

**Table S5.** Fit parameters for the samples derived from EIS experiments.

| Samples                                              | R <sub>s</sub><br>(Ω) | R <sub>p</sub><br>(Ω) | CPE-T<br>(F <sup>-1</sup> s <sup>1-n</sup> ) | R <sub>ct</sub><br>(Ω) | C <sub>dl</sub> -T<br>(F <sup>-1</sup> s <sup>1-n</sup> ) |
|------------------------------------------------------|-----------------------|-----------------------|----------------------------------------------|------------------------|-----------------------------------------------------------|
| CoMoO <sub>4</sub>                                   | 2.374                 | 140.7                 | 0.011576                                     | 326.5                  | 0.0052934                                                 |
| Co <sub>0.9</sub> Zn <sub>0.1</sub> MoO <sub>4</sub> | 2.165                 | 96.2                  | 0.013613                                     | 306.4                  | 0.007181                                                  |
| Co <sub>0.7</sub> Zn <sub>0.3</sub> MoO <sub>4</sub> | 2.134                 | 73.28                 | 0.025863                                     | 285.6                  | 0.008915                                                  |
| Co <sub>0.5</sub> Zn <sub>0.5</sub> MoO <sub>4</sub> | 2.74                  | 5.982                 | 0.0027973                                    | 133                    | 0.0032147                                                 |
| Co <sub>0.3</sub> Zn <sub>0.7</sub> MoO <sub>4</sub> | 2.021                 | 33.28                 | 0.014376                                     | 260.6                  | 0.011665                                                  |

**Table S6.** The defined molar ratios of initial materials for the fabrication of Co<sub>1-x</sub>Zn<sub>x</sub>MoO<sub>4</sub> (x= 0, 0.1, 0.3, 0.5, 0.7).

| Sample                                                  | Na <sub>2</sub> MoO <sub>4</sub> ·2H <sub>2</sub> O | Co(NO <sub>3</sub> ) <sub>2</sub> ·6H <sub>2</sub> O | Zn(NO <sub>3</sub> ) <sub>2</sub> ·6H <sub>2</sub> O |
|---------------------------------------------------------|-----------------------------------------------------|------------------------------------------------------|------------------------------------------------------|
| <b>CoMoO<sub>4</sub></b>                                | 2 mmol                                              | 2 mmol                                               | -                                                    |
| <b>Co<sub>0.9</sub> Zn<sub>0.1</sub>MoO<sub>4</sub></b> | 2 mmol                                              | 1.8 mmol                                             | 0.2mmol                                              |
| <b>Co<sub>0.7</sub> Zn<sub>0.3</sub>MoO<sub>4</sub></b> | 2 mmol                                              | 1.4 mmol                                             | 0.6 mmol                                             |
| <b>Co<sub>0.5</sub> Zn<sub>0.5</sub>MoO<sub>4</sub></b> | 2 mmol                                              | 1 mmol                                               | 1 mmol                                               |
| <b>Co<sub>0.3</sub> Zn<sub>0.7</sub>MoO<sub>4</sub></b> | 2 mmol                                              | 0.6 mmol                                             | 1.4 mmol                                             |
